# Supplementary material for: Exploring the relationship between gut microbiota and exercise: short-chain fatty acids and their role in metabolism
Source: HighWire-hosted journal article supplement (doi:10.1136/bmjsem-2020-000930), 2021-04-01
Supplement: bmjsem-2020-000930supp001_data_supplement.pdf [file bmjsem-2020-000930supp001_data_supplement.pdf]

## Appendix 1

| Title                                                                                                                                                                  | Author                                                                                                                                                                                              | Year | Model | Method                                                                                                                                                                                                                                                                                                                                                                                                                                                                                                                                                                                                                                                                                                                                                                                             | Key Findings                                                                                                                                                                                                                                                                                                                                                                                     |
|------------------------------------------------------------------------------------------------------------------------------------------------------------------------|-----------------------------------------------------------------------------------------------------------------------------------------------------------------------------------------------------|------|-------|----------------------------------------------------------------------------------------------------------------------------------------------------------------------------------------------------------------------------------------------------------------------------------------------------------------------------------------------------------------------------------------------------------------------------------------------------------------------------------------------------------------------------------------------------------------------------------------------------------------------------------------------------------------------------------------------------------------------------------------------------------------------------------------------------|--------------------------------------------------------------------------------------------------------------------------------------------------------------------------------------------------------------------------------------------------------------------------------------------------------------------------------------------------------------------------------------------------|
| <b>Microbial Fermentation Of Flaxseed Fibres Modulates The Transcriptome Of GPR41-Expressing Enteroendocrine Cells And Protects Mice Against Diet-Induced Obesity.</b> | Arora, Tulika<br>Rudenko, Olga<br>Egerod, Kristoffer<br>Lihme<br>Husted, Anna<br>Sofie<br>Kovatcheva-Datchary, Petia<br>Akrami, Rozita<br>Kristensen, Mette<br>Schwartz, Thue W<br>Bäckhed, Fredrik | 2018 | Mouse | <p>GPR41 promoter controlled red fluorescent protein in mice fed 4 different diets: normal chow, high fat diet, high fat diet with 10% non-fermentable fibre cellulose and high fat diet with 10% fermentable flaxseed fiber. All diets were conducted for 12 weeks.</p> <p>Evaluation of: microbiota changes enteroendocrine cell transcriptome in ileum and colon.</p> <p>Additionally, the authors measured body weight and fat mass, energy expenditure, food and water intake during exercise.</p> <p>SCFAs and organic acids were measured by gas chromatography.</p> <p>GPR41 controlled RFP mice. Randomly assigned to the aforementioned 4 diets. The ileum and colon tissue was harvested, used to create a single cell suspension for RNA extraction to evaluate the transcriptome.</p> | <p>Supplementation of flaxseed fibres increases the abundance of caecal <i>Akkermansia</i> and <i>Bifidobacterium</i>.</p> <p>A high fat with the addition of flaxseed fibre restored butyrate level to comparable of that in mice fed normal chow.</p> <p>Measurements of acetate and propionate were unaffected by soluble fibre.</p> <p>Flaxseed supplementation alters GPR41 expression.</p> |

|                                                                                                                                                                      |                                                                                                                                                             |             |              |                                                                                                                                                                                                                                          |                                                                                                                                                                                                                                                                                                                                                                                                                                                                      |
|----------------------------------------------------------------------------------------------------------------------------------------------------------------------|-------------------------------------------------------------------------------------------------------------------------------------------------------------|-------------|--------------|------------------------------------------------------------------------------------------------------------------------------------------------------------------------------------------------------------------------------------------|----------------------------------------------------------------------------------------------------------------------------------------------------------------------------------------------------------------------------------------------------------------------------------------------------------------------------------------------------------------------------------------------------------------------------------------------------------------------|
| <p><b>The Microbiome Of Professional Athletes Differs From That Of More Sedentary Subjects In Composition And Particularly At The Functional Metabolic Level</b></p> | <p>Barton, Wiley Penney, Nicholas C Cronin, Owen Garcia-Perez, Isabel Molloy, Michael G Holmes, Elaine Shanahan, Fergus Cotter, Paul D O'Sullivan, Orla</p> | <p>2018</p> | <p>Human</p> | <p>Metabolic phenotyping and metagenomic analysis of the gut microbiome of 40 professional international rugby union players.</p> <p>Whole metagenome shotgun sequencing, metabolic phenotype of the players and the gut microbiota.</p> | <p>Diversity of microbiota increased in professional athletes compared with high BMI and low BMI controls.</p> <p>Increased Akkermansia in the gut of the athlete population.</p> <p>Difference of 98 metabolic pathways between athlete and control cohorts.</p> <p>The athlete group had the highest mean difference in metabolic pathways.</p> <p>The SCFA levels in faecal matter showed significantly higher levels of acetate relative to control samples.</p> |
|----------------------------------------------------------------------------------------------------------------------------------------------------------------------|-------------------------------------------------------------------------------------------------------------------------------------------------------------|-------------|--------------|------------------------------------------------------------------------------------------------------------------------------------------------------------------------------------------------------------------------------------------|----------------------------------------------------------------------------------------------------------------------------------------------------------------------------------------------------------------------------------------------------------------------------------------------------------------------------------------------------------------------------------------------------------------------------------------------------------------------|

|                                                                                                          |                                                                                                                                                                                     |             |            |                                                                                                                                                                                                                                                                                                                                                                                                                                                                                                                                                                                                                                                                                                                                   |                                                                                                                                                                                                                                                                                                                                                                                                                                                                                                                                                                                                                                                                                          |
|----------------------------------------------------------------------------------------------------------|-------------------------------------------------------------------------------------------------------------------------------------------------------------------------------------|-------------|------------|-----------------------------------------------------------------------------------------------------------------------------------------------------------------------------------------------------------------------------------------------------------------------------------------------------------------------------------------------------------------------------------------------------------------------------------------------------------------------------------------------------------------------------------------------------------------------------------------------------------------------------------------------------------------------------------------------------------------------------------|------------------------------------------------------------------------------------------------------------------------------------------------------------------------------------------------------------------------------------------------------------------------------------------------------------------------------------------------------------------------------------------------------------------------------------------------------------------------------------------------------------------------------------------------------------------------------------------------------------------------------------------------------------------------------------------|
| <p><b>Microbiota-Generated Metabolites Promote Metabolic Benefits Via Gut-Brain Neural Circuits.</b></p> | <p>De Vadder, Filipe<br/>Kovatcheva-Datchary, Petia<br/>Goncalves, Daisy<br/>Vinera, Jennifer<br/>Zitoun, Carine<br/>Duchamp, Adeline<br/>Bäckhed, Fredrik<br/>Mithieux, Gilles</p> | <p>2014</p> | <p>Rat</p> | <p>Measurement of gluconeogenesis in rats fed propionate, butyrate and fructo-oligosaccharides.</p> <p>Model of Caco-2 cells for intestinal enterocytes, exposed to butyrate to measure G6PC and PCK1 expression as well as intracellular cAMP concentration.</p> <p>Assessment of whether propionate mediates intestinal gluconeogenesis through gut-brain communication through periportal nervous deafferentation.</p> <p>Rat models were fed SCFA and fructo-oligosaccharide diets for 2 weeks. Immunofluorescence was conducted to identify FFAR3 expression in the portal vein.</p> <p>Exposure to beta hydroxybutyrate, an antagonist for GPR41 to identify whether this affected propionate-induced GPR41 activation.</p> | <p>Propionate and butyrate activate intestinal gluconeogenesis.</p> <p>Propionate-induced gluconeogenesis accounted for 23% of total glucose production.</p> <p>In vitro exposure to butyrate resulted in G6PC and PCK1 expression as well as a 3 fold increase of intracellular cAMP</p> <p>Propionate induces IGN gene expression via a gut-brain neural circuit.</p> <p>Propionate could not increase G6Pase activity and PCK1, but butyrate could.</p> <p>Propionate activation can be reversed by Beta-hydroxybutyrate.</p> <p>Dietary propionate causes a 2 to 3-fold increase in the expression of c-Fos.</p> <p>Neuronal activation was not seen in capsaicin- treated rats.</p> |
|----------------------------------------------------------------------------------------------------------|-------------------------------------------------------------------------------------------------------------------------------------------------------------------------------------|-------------|------------|-----------------------------------------------------------------------------------------------------------------------------------------------------------------------------------------------------------------------------------------------------------------------------------------------------------------------------------------------------------------------------------------------------------------------------------------------------------------------------------------------------------------------------------------------------------------------------------------------------------------------------------------------------------------------------------------------------------------------------------|------------------------------------------------------------------------------------------------------------------------------------------------------------------------------------------------------------------------------------------------------------------------------------------------------------------------------------------------------------------------------------------------------------------------------------------------------------------------------------------------------------------------------------------------------------------------------------------------------------------------------------------------------------------------------------------|

|                                                                                                                              |                                                                                                                                                                                                                                                                                                    |             |              |                                                                                                                                                                                                                                                                                                                  |                                                                                                                                                                                                                                                                                                                                                                                                                                                                                                                                                                                                                                                                                                                           |
|------------------------------------------------------------------------------------------------------------------------------|----------------------------------------------------------------------------------------------------------------------------------------------------------------------------------------------------------------------------------------------------------------------------------------------------|-------------|--------------|------------------------------------------------------------------------------------------------------------------------------------------------------------------------------------------------------------------------------------------------------------------------------------------------------------------|---------------------------------------------------------------------------------------------------------------------------------------------------------------------------------------------------------------------------------------------------------------------------------------------------------------------------------------------------------------------------------------------------------------------------------------------------------------------------------------------------------------------------------------------------------------------------------------------------------------------------------------------------------------------------------------------------------------------------|
| <p><b>The Gut Microbiota Suppresses Insulin-Mediated Fat Accumulation Via The Short-Chain Fatty Acid Receptor GPR43.</b></p> | <p>Kimura, Ikuo<br/>Ozawa, Kentaro<br/>Inoue, Daisuke<br/>Imamura, Takeshi<br/>Kimura, Kumi<br/>Maeda, Takeshi<br/>Terasawa, Kazuya<br/>Kashihara, Daiji<br/>Hirano, Kanako<br/>Tani, Taeko<br/>Takahashi, Tomoyuki<br/>Miyachi, Satoshi<br/>Shioi, Go<br/>Inoue, Hiroshi<br/>Tsujimoto, Gozoh</p> | <p>2013</p> | <p>Mouse</p> | <p>P2 promoter-driven adipose-specific Gpr43 transgenic mice.</p> <p>Exposure with acetate followed by bolus of insulin was administered intraperitoneally.</p> <p>Measurement of Akt phosphorylation of Ser473.</p> <p>Evaluation of SCFA and GPR43 activity on insulin signalling in white adipose tissue.</p> | <p>Differences in acetate-suppressed insulin impact were seen in distinct mouse and tissue.</p> <p>Lipoprotein lipase activity was higher in GPR43 knockout mice and lower in the Ap2-promoter driven transgenic mice.</p> <p>Acetate suppressed insulin-induced glucose and fatty acid uptake in adipocytes, not in Gpr43 knockout mice.</p> <p>Plasma triglycerides were low in Gpr43 knockout mice fed high fat diets when compared with aP2-GPR43 transgenic mouse.</p> <p>This effect was not demonstrated in germ-free mice or after antibiotics, indicating a role of the gut microbiota.</p> <p>GPR43 promotes energy expenditure through uptake of glucose and lipids into other tissues other than adipose.</p> |
|------------------------------------------------------------------------------------------------------------------------------|----------------------------------------------------------------------------------------------------------------------------------------------------------------------------------------------------------------------------------------------------------------------------------------------------|-------------|--------------|------------------------------------------------------------------------------------------------------------------------------------------------------------------------------------------------------------------------------------------------------------------------------------------------------------------|---------------------------------------------------------------------------------------------------------------------------------------------------------------------------------------------------------------------------------------------------------------------------------------------------------------------------------------------------------------------------------------------------------------------------------------------------------------------------------------------------------------------------------------------------------------------------------------------------------------------------------------------------------------------------------------------------------------------------|

|                                                                                                                                            |                                                                                                                                                                                                                             |             |                                 |                                                                                                                                                                                                                                                                                                                                                                                                                                                                                                                                                                        |                                                                                                                                                                                                                                                                                                                                                         |
|--------------------------------------------------------------------------------------------------------------------------------------------|-----------------------------------------------------------------------------------------------------------------------------------------------------------------------------------------------------------------------------|-------------|---------------------------------|------------------------------------------------------------------------------------------------------------------------------------------------------------------------------------------------------------------------------------------------------------------------------------------------------------------------------------------------------------------------------------------------------------------------------------------------------------------------------------------------------------------------------------------------------------------------|---------------------------------------------------------------------------------------------------------------------------------------------------------------------------------------------------------------------------------------------------------------------------------------------------------------------------------------------------------|
| <p><b>ANGPTL4 Expression Induced By Butyrate And Rosiglitazone In Human Intestinal Epithelial Cells Utilizes Independent Pathways.</b></p> | <p>Korecka, Agata<br/>de Wouters, Tomas<br/>Cultrone, Antonietta<br/>Lapaque, Nicolas<br/>Pettersson, Sven<br/>Doré, Joël<br/>Blottière, Hervé M<br/>Arulampalam, Velmurugesan</p>                                          | <p>2013</p> | <p>Cell Model + mouse model</p> | <p>Using cell lines, exposed to butyrate or rosiglitazone. This was repeated in HT-29 cells - as this showed largest initial response.</p> <p>Butyrate administration to germ-free mice, comparison with sterile water as a control.</p> <p>Measured ANGPTL4 mRNA expression in epithelial cells.</p> <p>Measured PPAR-<math>\gamma</math> in HT-29 cells treated with butyrate acetate and propionate.</p> <p>Introduction of <i>C. tyrobutyricum</i> to germ-free mice.</p> <p>Measured induction of ANGPTL4 expression in ileal and colonic epithelium samples.</p> | <p>All 3 cell lines showed an increase in ANGPTL4 transcription when exposed to butyrate.</p> <p>When treating the cells with butyrate, the level of PPAR-<math>\gamma</math> was lower.</p> <p>Butyrate-induced ANGPTL4 expression is not dependent on PPAR-<math>\gamma</math> signalling.</p>                                                        |
| <p><b>Microbial Modulation Of Energy Availability In The Colon Regulates Intestinal Transit.</b></p>                                       | <p>Wichmann, Anita<br/>Allahyar, Ava<br/>Greiner, Thomas U<br/>Plovier, Hubert<br/>Lundén, Gunnel<br/>Östergren Larsson, Thomas<br/>Drucker, Daniel J<br/>Delzenne, Nathalie M<br/>Cani, Patrice D<br/>Bäckhed, Fredrik</p> | <p>2013</p> | <p>Mice</p>                     | <p>The authors compared portal vein expression of GLP-1 in germ-free mice to wild type mice.</p> <p>Transplanted microbiota from a wild type mouse and measured Gcg expression in the colon after 24 and 72 hr.</p> <p>Incubation of proximal colon tissue with either a physiological concentration of SCFAs or saline as a control.</p>                                                                                                                                                                                                                              | <p>The absence of microbially-produced SCFAs in germ-free mice colon results in significantly higher plasma GLP-1 levels compared with germ free control mice.</p> <p>After 72 hours the number of GLP-1 expressing cells decreased to baseline levels.</p> <p>Colonic tissue when exposed to SCFAs showed reduction in Gcg expression in GF colon.</p> |

|                                                                                                                        |                                                                                                                                                    |      |     |                                                                                                                                                                                                                                                                                                                                     |                                                                                                                                                                                                                                                                                                                                                          |
|------------------------------------------------------------------------------------------------------------------------|----------------------------------------------------------------------------------------------------------------------------------------------------|------|-----|-------------------------------------------------------------------------------------------------------------------------------------------------------------------------------------------------------------------------------------------------------------------------------------------------------------------------------------|----------------------------------------------------------------------------------------------------------------------------------------------------------------------------------------------------------------------------------------------------------------------------------------------------------------------------------------------------------|
| <b>Activation Of Short And Long Chain Fatty Acid Sensing Machinery In The Ileum Lowers Glucose Production In Vivo.</b> | Zadeh-Tahmasebi, Melika<br>Duca, Frank A<br>Rasmussen, Brittany A<br>Bauer, Paige V<br>Côté, Clémence D<br>Filippi, Beatrice M<br>Lam, Tony K<br>T | 2016 | Rat | <p>Propionate infusion into ileum whilst using pancreatic clamping to maintain plasma glucose measurements.</p> <p>They used viral knockdown of FFAR2.</p> <p>Then compared to GLP-1 antagonist and repeated experiment.</p> <p>Additionally authors used local anaesthetic infusion to limit influence of gut vagal afferents.</p> | <p>In wild type mice, propionate infusion for 50 minutes resulted in an increase in glucose needed to maintain euglycemia.</p> <p>Ileal infusion with propionate resulted in an increase glucose demand to maintain euglycemia. These effects were not seen with plasma infusion.</p> <p>Propionate sensing is dependent on the activation of FFAR2.</p> |
|------------------------------------------------------------------------------------------------------------------------|----------------------------------------------------------------------------------------------------------------------------------------------------|------|-----|-------------------------------------------------------------------------------------------------------------------------------------------------------------------------------------------------------------------------------------------------------------------------------------------------------------------------------------|----------------------------------------------------------------------------------------------------------------------------------------------------------------------------------------------------------------------------------------------------------------------------------------------------------------------------------------------------------|
